# Supplementary material for: Differential requirement for dimerization partner DP between E2F-dependent activation of tumor suppressor and growth-related genes
Source: PubMed Central journal article supplement (PMC5981219; doi:10.1038/s41598-018-26860-0), 2018-05-31
Supplement: 41598_2018_26860_MOESM1_ESM.pdf [file 41598_2018_26860_MOESM1_ESM.pdf]

**Differential requirement for dimerization partner DP between E2F-dependent activation of tumor suppressor and growth-related genes**

Hideyuki Komori<sup>1</sup>, Yasuko Goto<sup>2</sup>, Kenta Kurayoshi<sup>2</sup>, Eiko Ozono<sup>3</sup>, Ritsuko Iwanaga<sup>4</sup>, Andrew P. Bradford<sup>5</sup>, Keigo Araki<sup>2</sup> and Kiyoshi Ohtani<sup>2</sup>

<sup>1</sup>Life Sciences Institute, University of Michigan,  
210 Washtenaw Avenue, Ann Arbor, MI 48109-2216, USA

<sup>2</sup>Department of Biomedical Chemistry, School of Science and Technology,  
Kwansei Gakuin University,  
2-1 Gakuen, Sanda, Hyogo, 669-1337, Japan

<sup>3</sup>Chromosome Replication Lab, The Francis Crick Institute,  
Midland Road, NW1 1AT, UK

<sup>4</sup>Department of Craniofacial Biology,  
University of Colorado School of Dental Medicine, Anschutz Medical Campus,  
12801 East 17th Avenue, Aurora, CO 80045, USA

<sup>5</sup>Department of Obstetrics and Gynecology,  
University of Colorado School of Medicine, Anschutz Medical Campus,  
12800 East 19th Avenue, Aurora, CO 80045, USA

*Correspondence:*

Kiyoshi Ohtani

Department of Biomedical Chemistry, School of Science and Technology,  
Kwansei Gakuin University,  
2-1 Gakuen, Sanda, Hyogo, 669-1337, Japan

Phone: +81-79-565-7219

Fax: +81-3-79-565-7219

E-mail: btm88939@kwansei.ac.jp

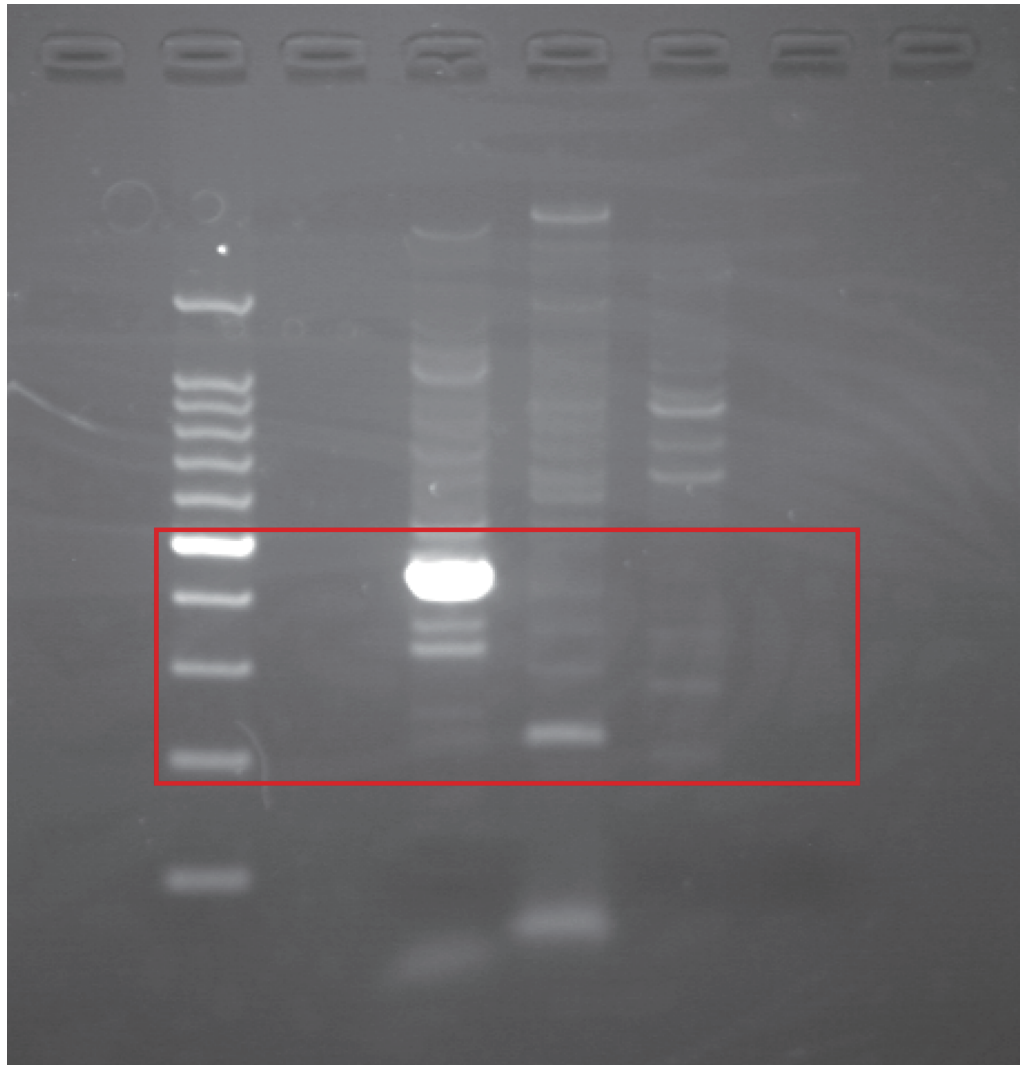

Supplementary Figure S1

Full-length gel of PCR products illustrated in Figure 1(A).



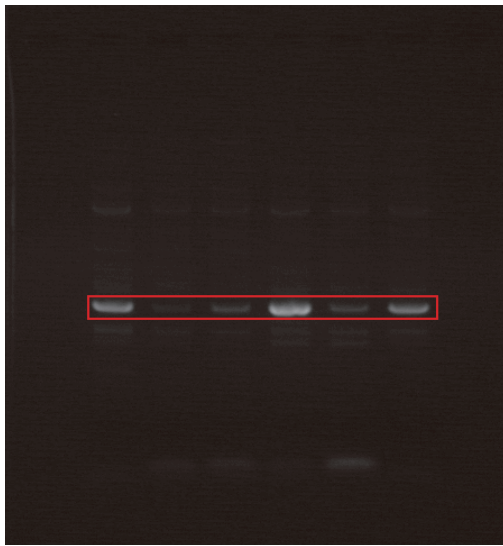

*DP1*

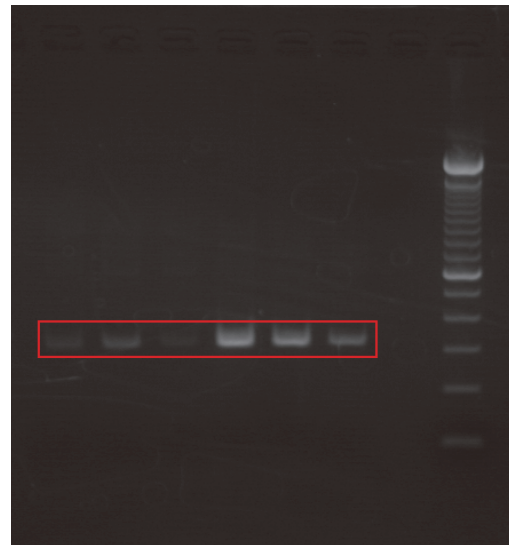

*CDC6*

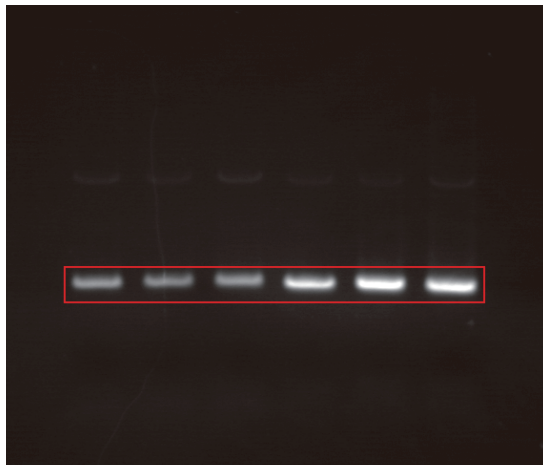

*ARF*

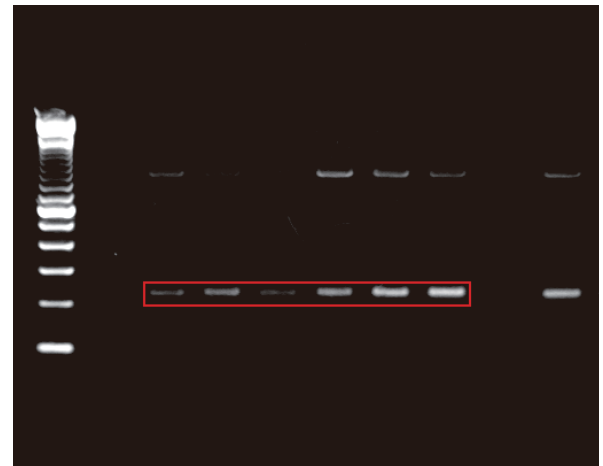

*Bax*

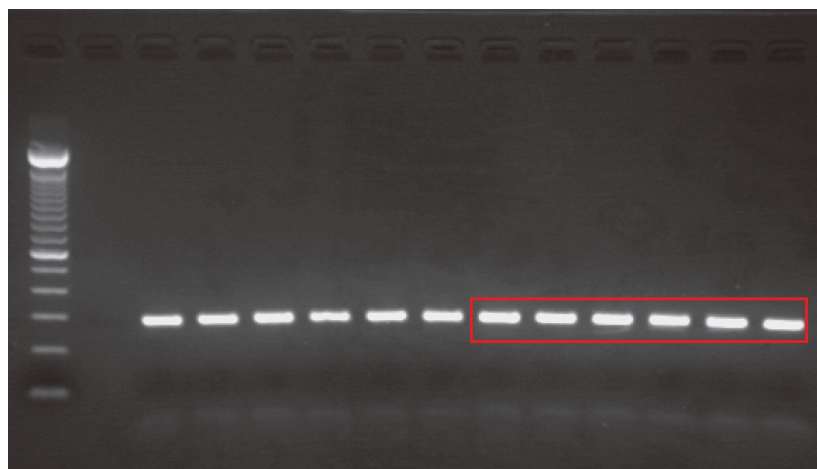

*GAPDH*

Supplementary Figure S2

Full-length gels of indicated PCR products illustrated in Figure 1(C).

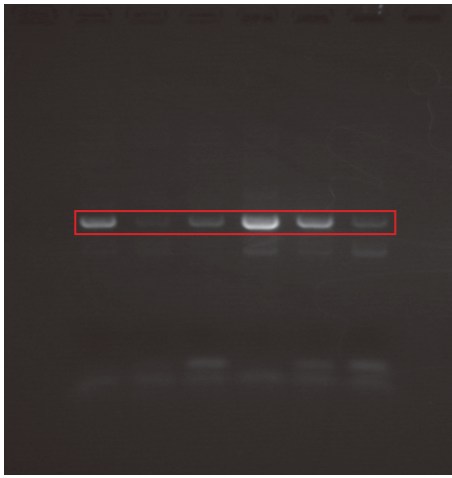

*DP1*

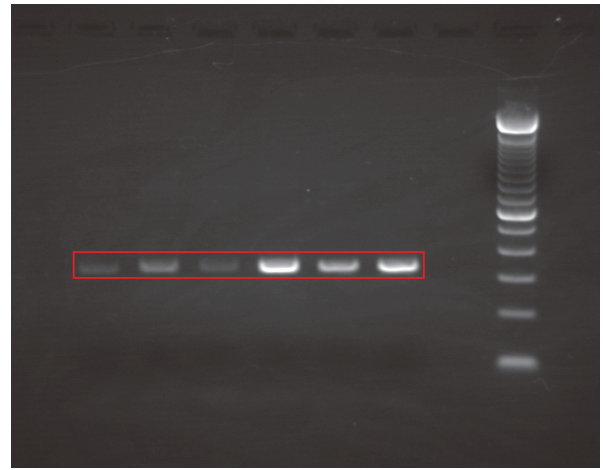

*CDC6*

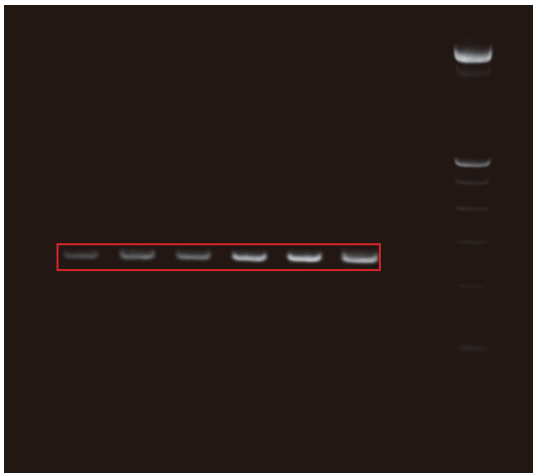

*ARF*

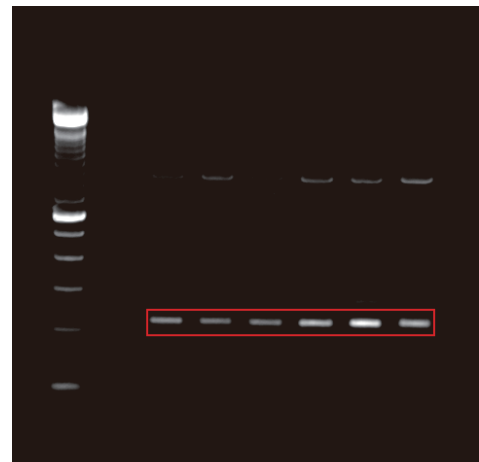

*Bax*

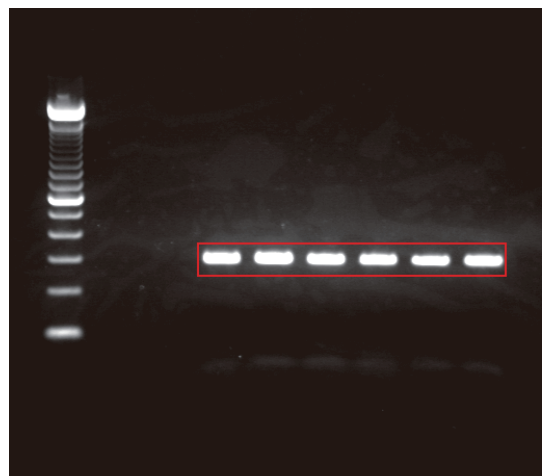

*GAPDH*

Supplementary Figure S3

Full-length gels of indicated PCR products illustrated in Figure 1(D).

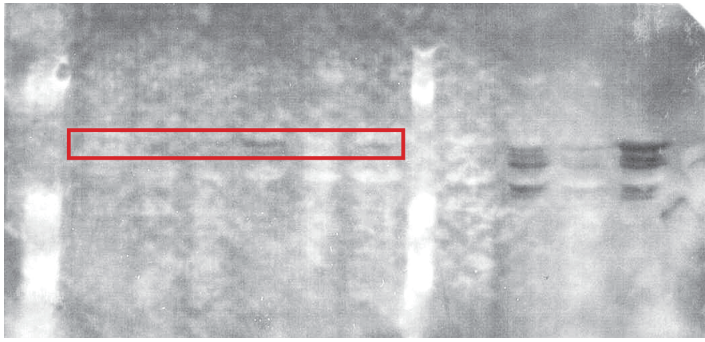

DP1

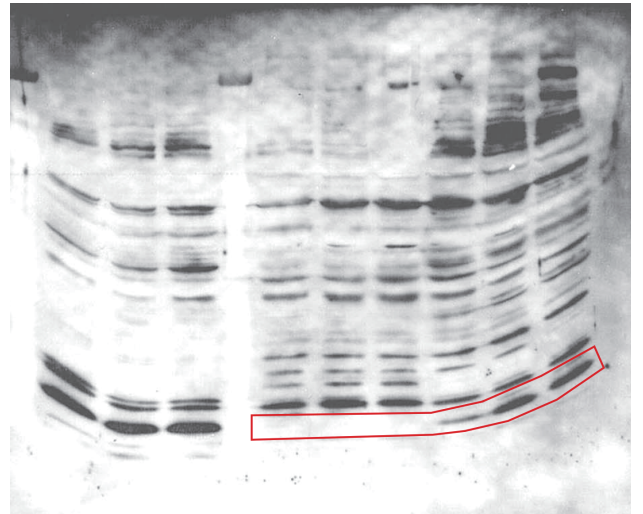

ARF

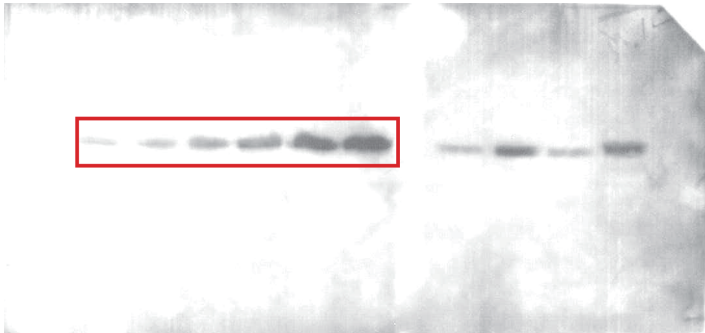

p53

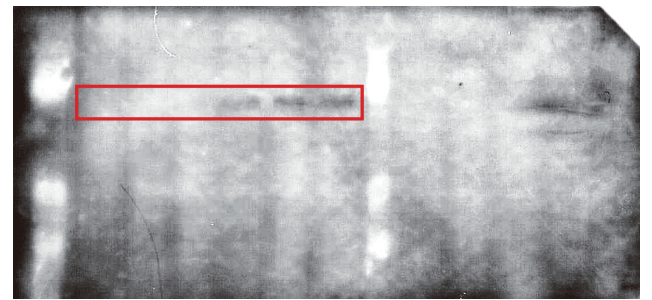

E2F1

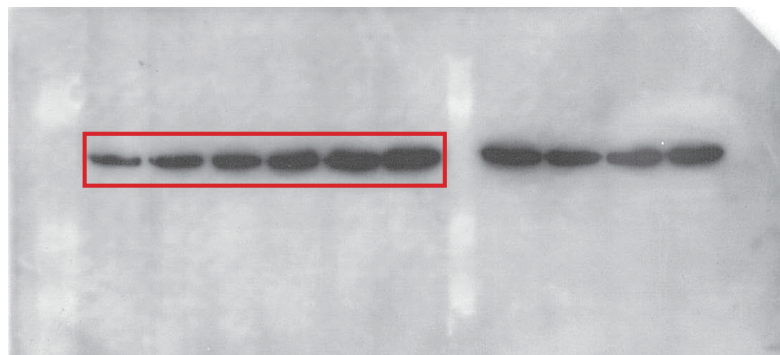

$\alpha$ -tubulin

Supplementary Figure S4

Full-length blots of indicated proteins illustrated in Figure 1(E).

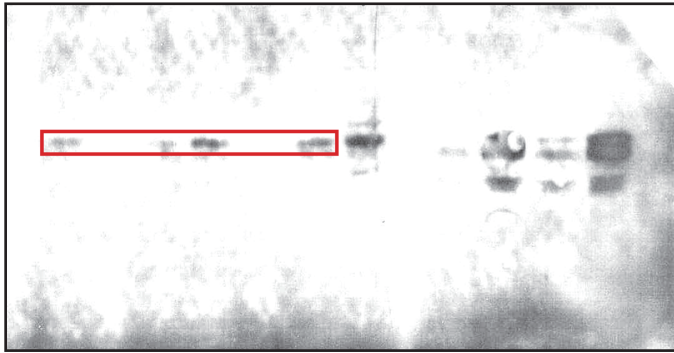

DP1

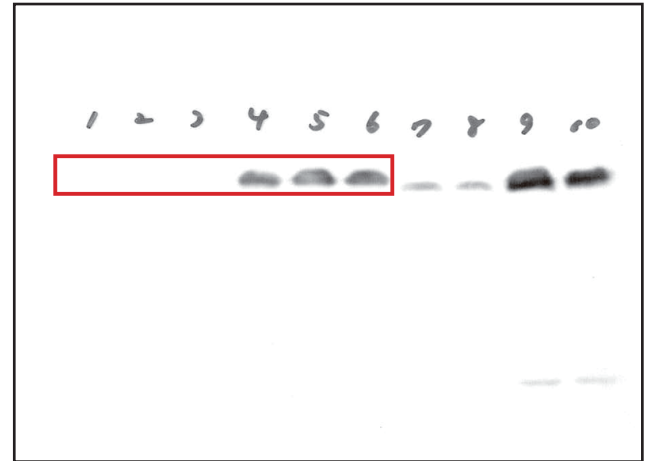

p53

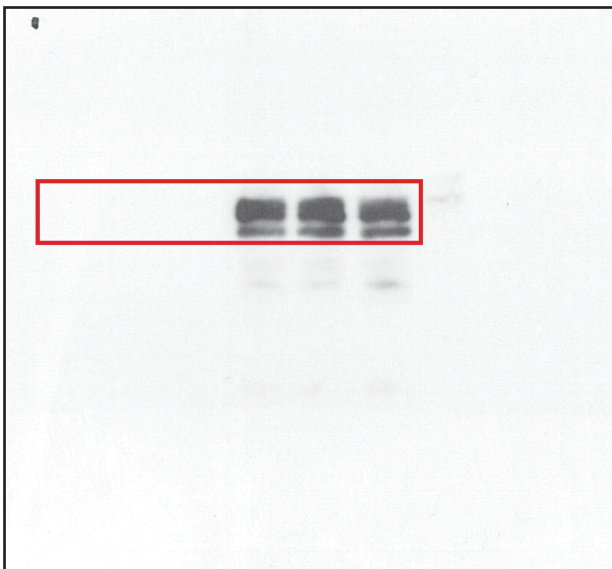

E1a

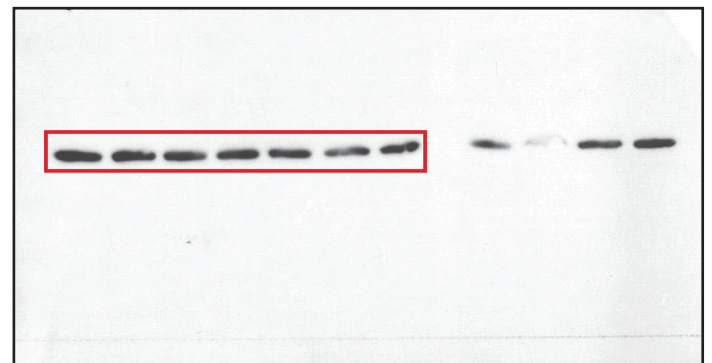

$\alpha$ -tubulin

Supplementary Figure S5

Full-length blots of indicated proteins illustrated in Figure 1(F).



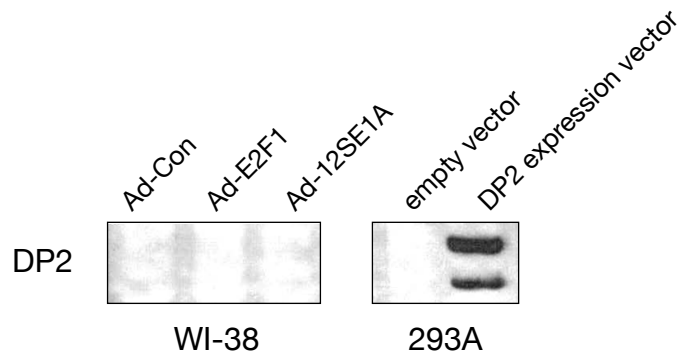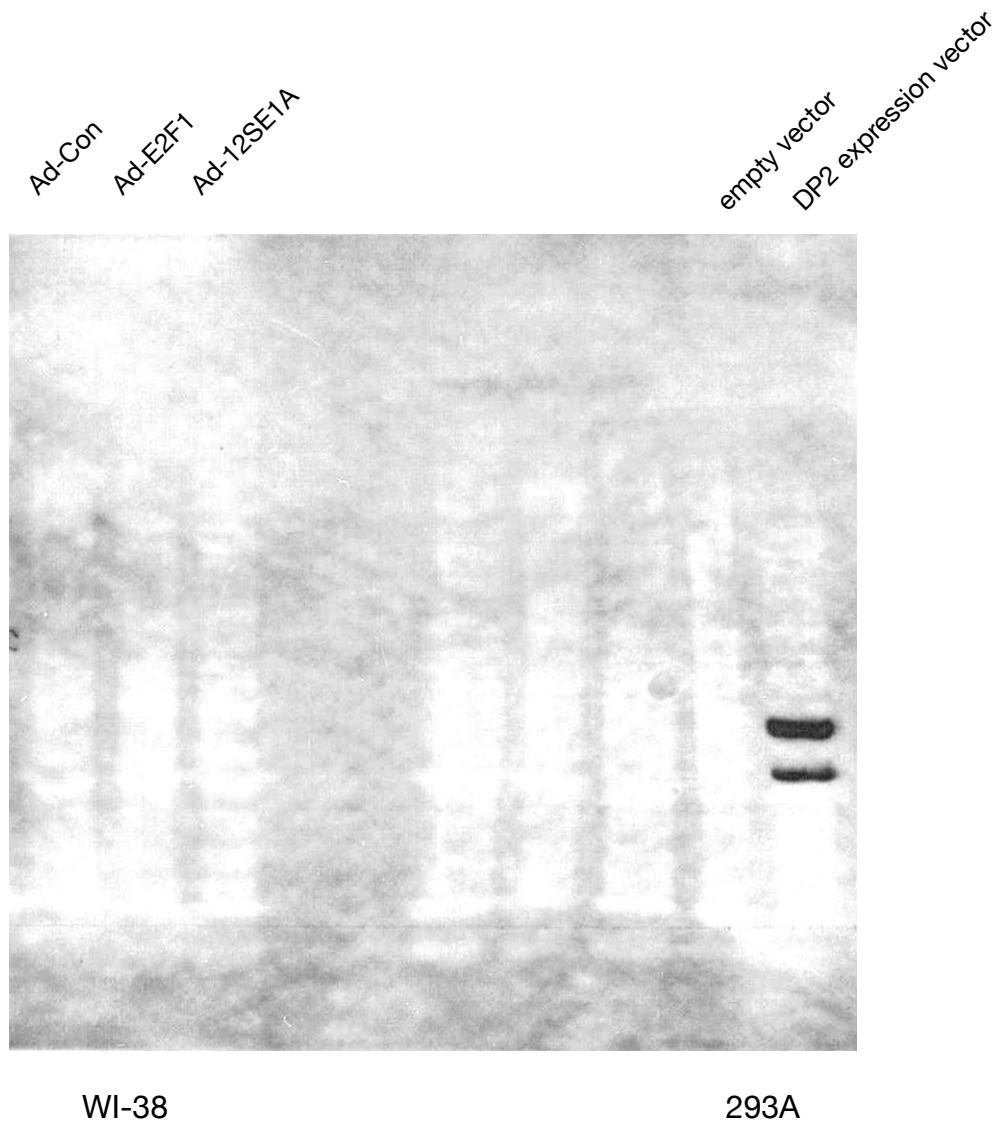

### Supplementary Figure S6

Expression of DP2 protein was not detected by immunoblot analysis even with ectopic expression of E2F1 or E1a. Lower panel is full-length blot of upper panel.

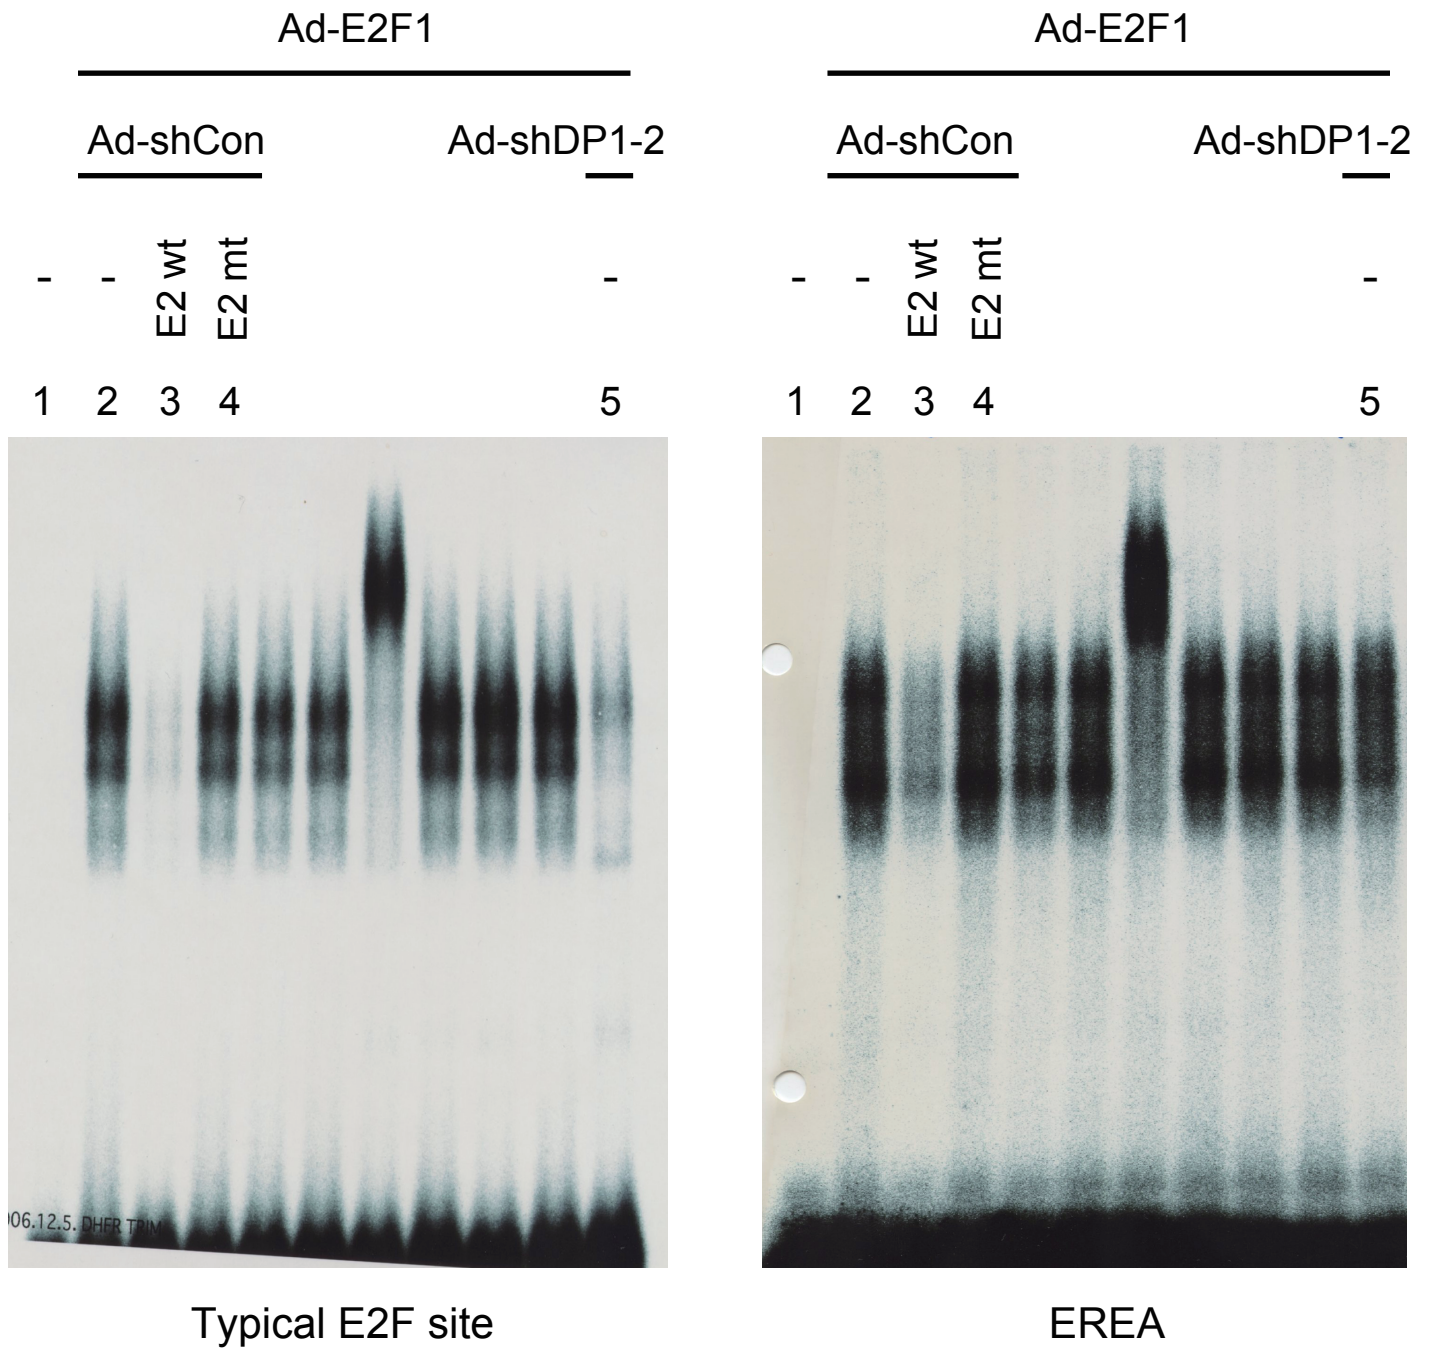

Supplementary Figure S7

Full-length gels of gel mobility shift assays illustrated in Figure 2 (B).

ARF

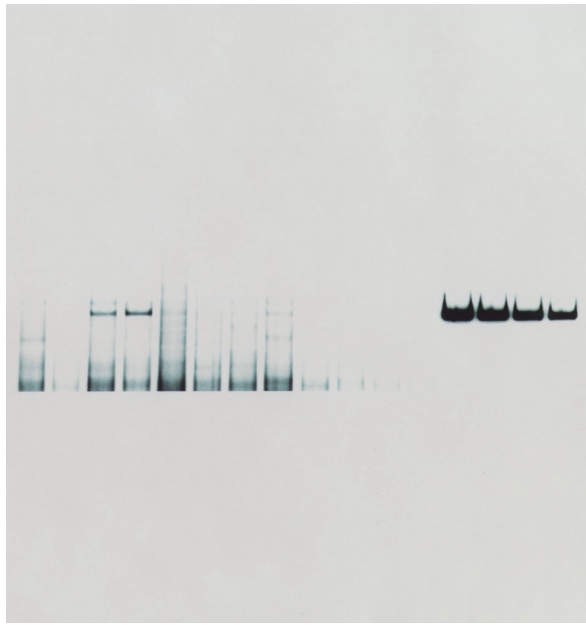

CDC6

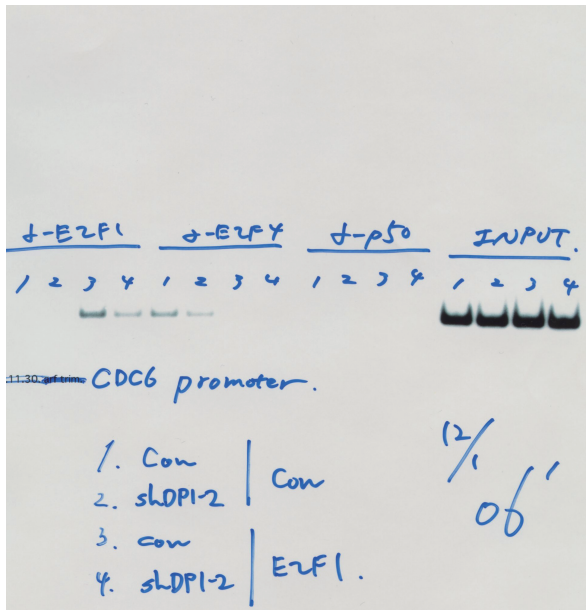

β-actin

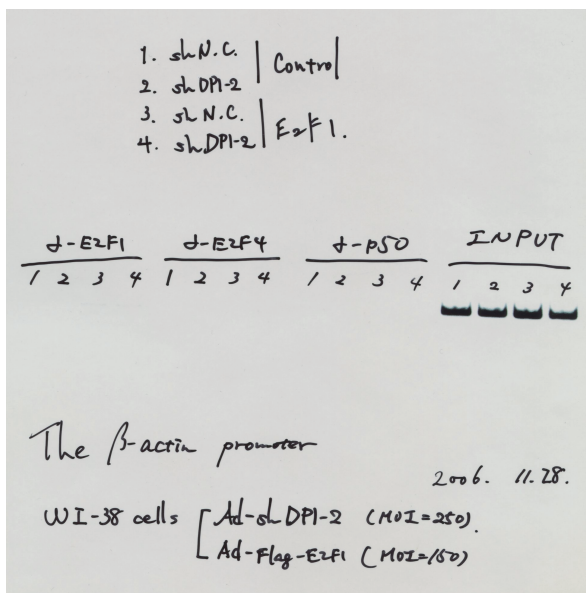

Supplementary Figure S8

Full-length gels of ChIP analysis illustrated in Figure 2(C).

|         |   |   |   |   |
|---------|---|---|---|---|
| Ad-E2F1 | - | + | - | + |
| Ad-DP1  | - | - | + | + |

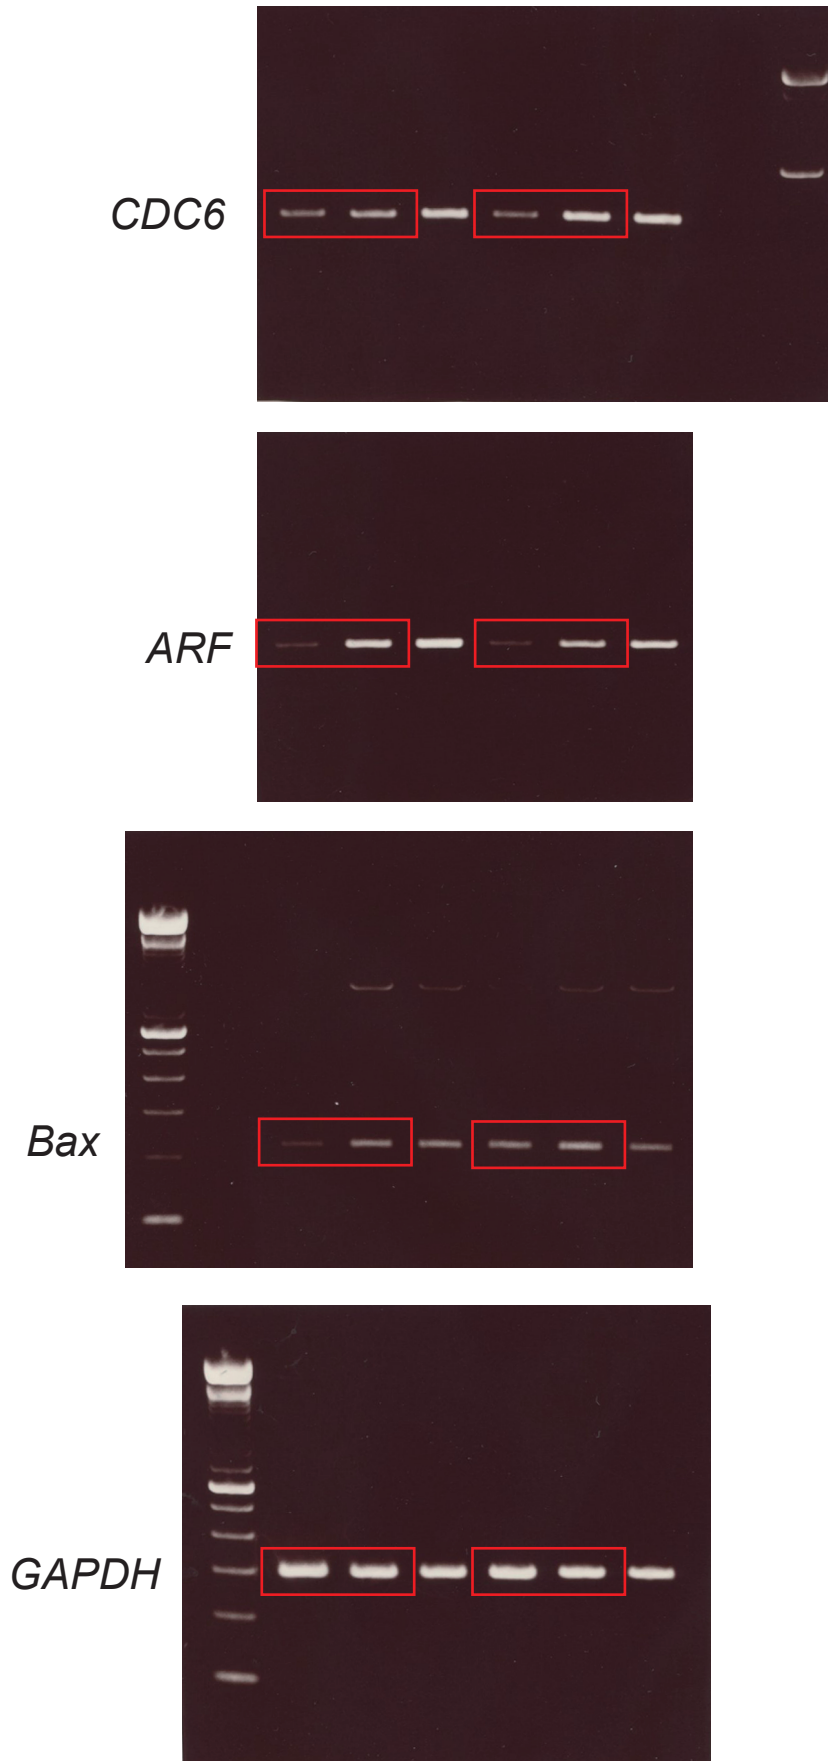

Supplementary Figure S9

Full-length gels of indicated PCR products illustrated in Figure 3(A).



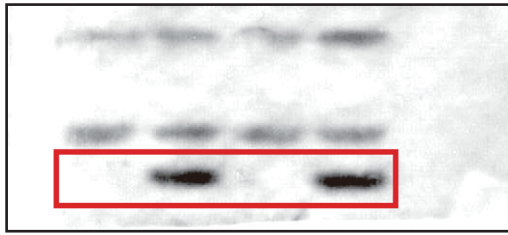

ARF

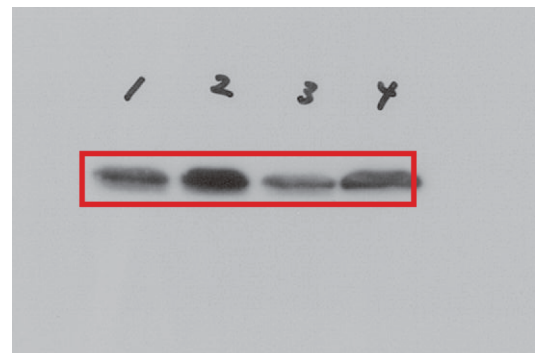

p53

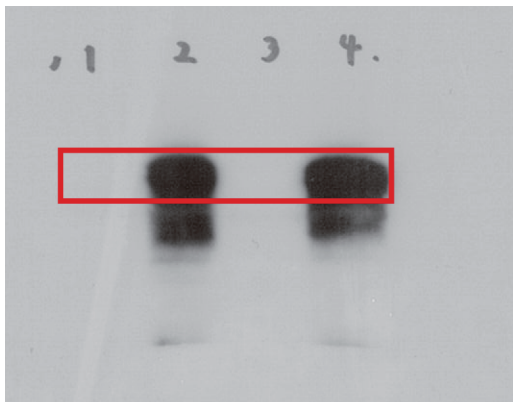

E2F1

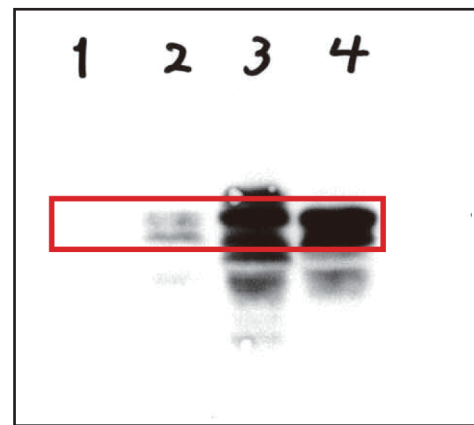

DP1

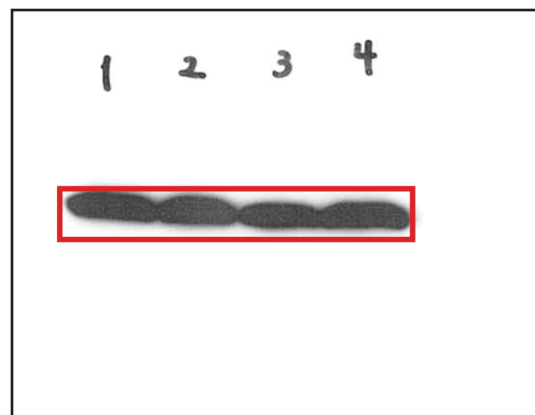

$\alpha$ -tubulin

Supplementary Figure S10

Full-length blots of indicted proteins illustrated in Figure 3(B).

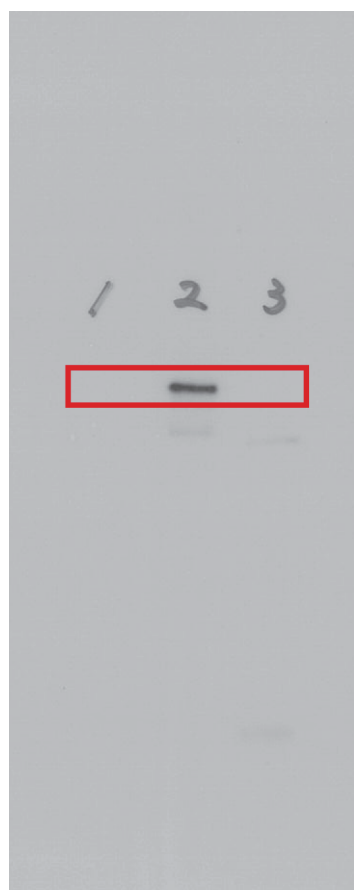

GST-E2F1

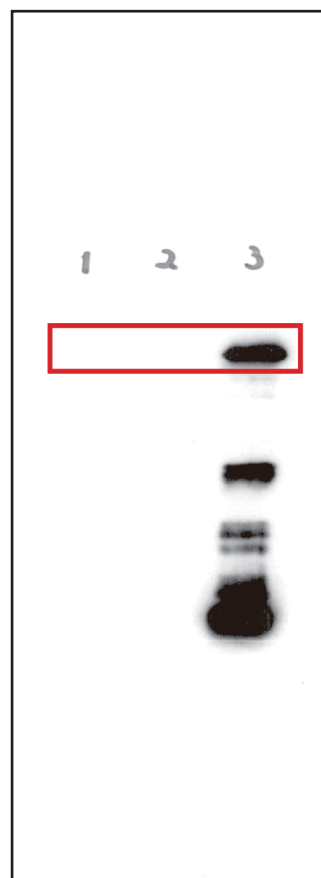

GST-DP1

### Supplementary Figure S11

Full-length blots of purified GST-E2F1 and GST-DP1 illustrated in Figure 3(D).

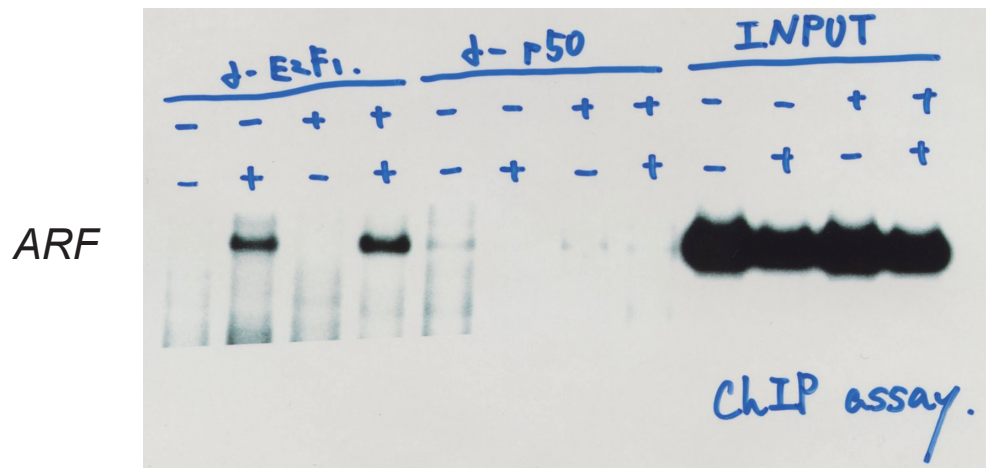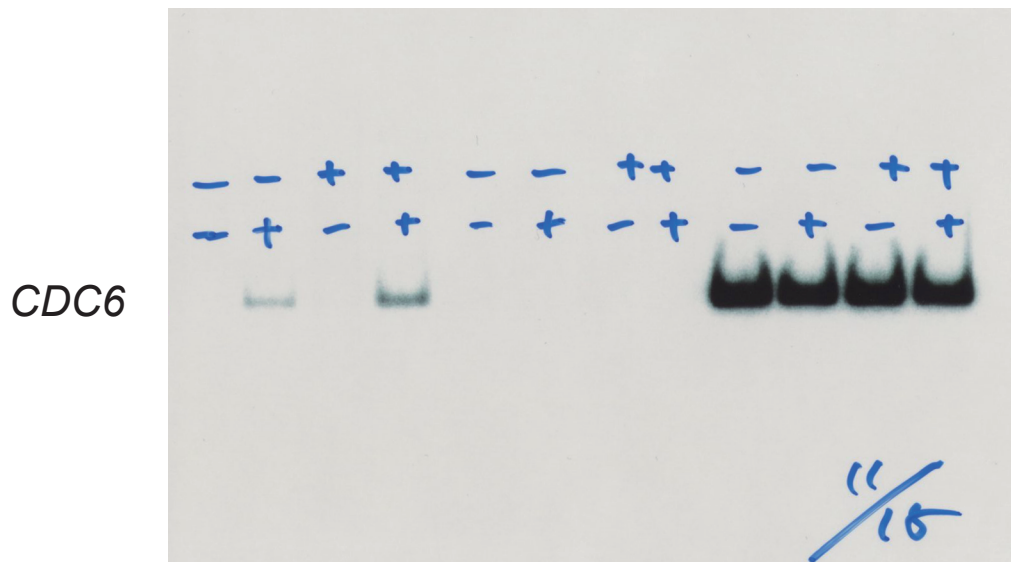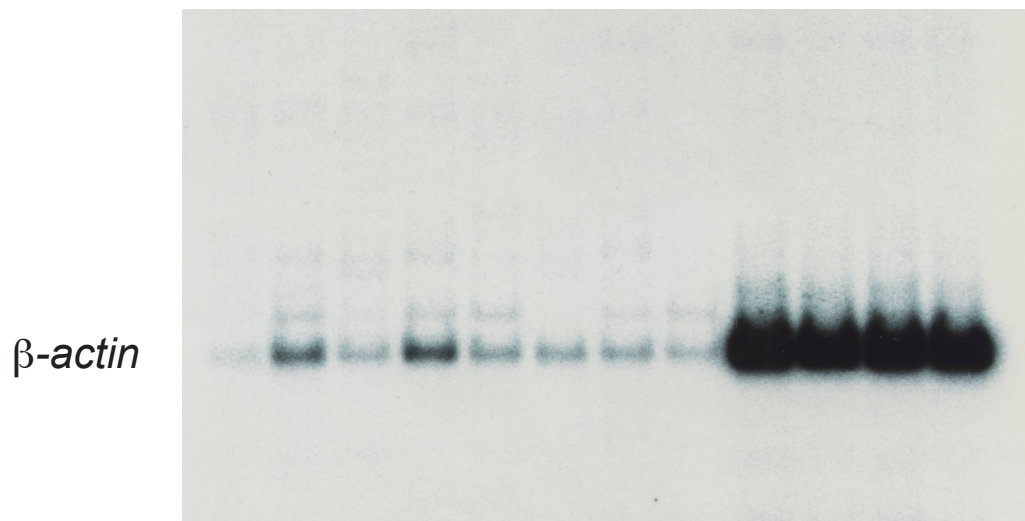

Supplementary Figure S12

Full-length gels of ChIP analysis illustrated in Figure 3(E).

*DP1*

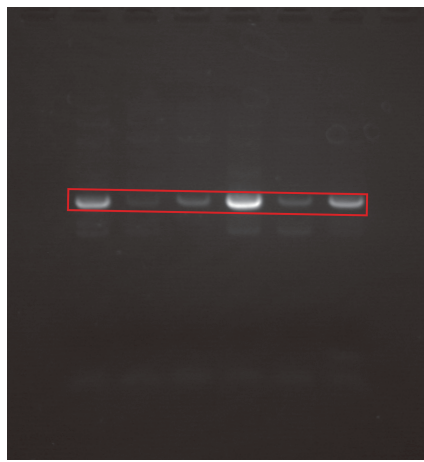

*DP2*

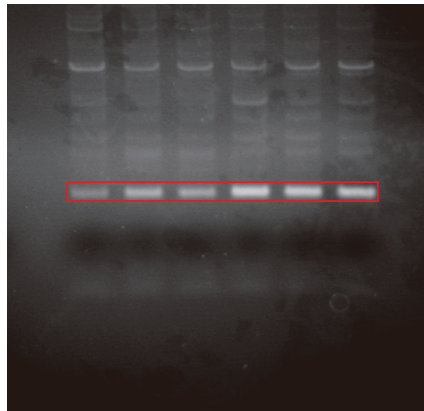

*DP3*

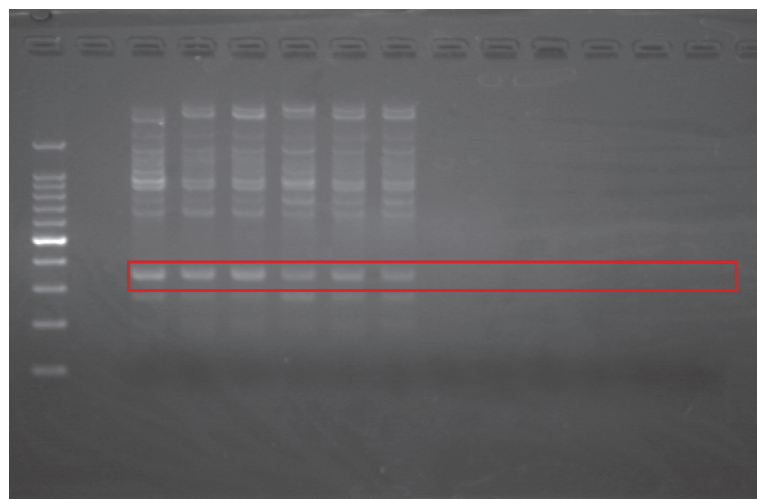

*GAPDH*

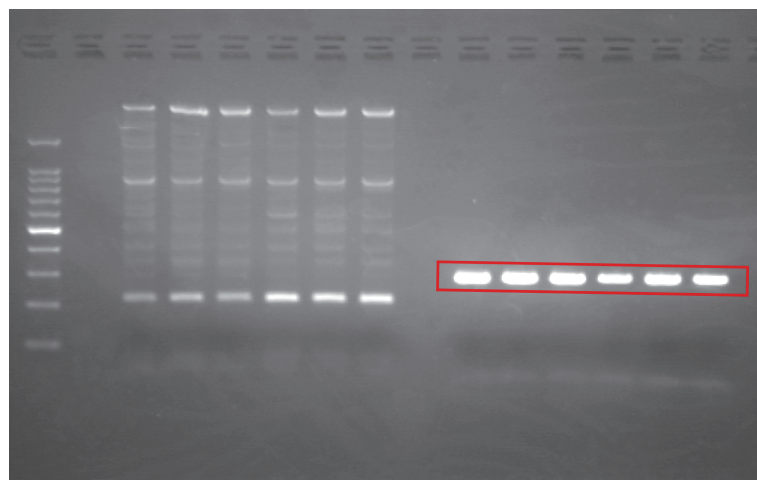

Supplementary Figure S13

Full-length gels of indicated PCR products illustrated in Figure 4(A).

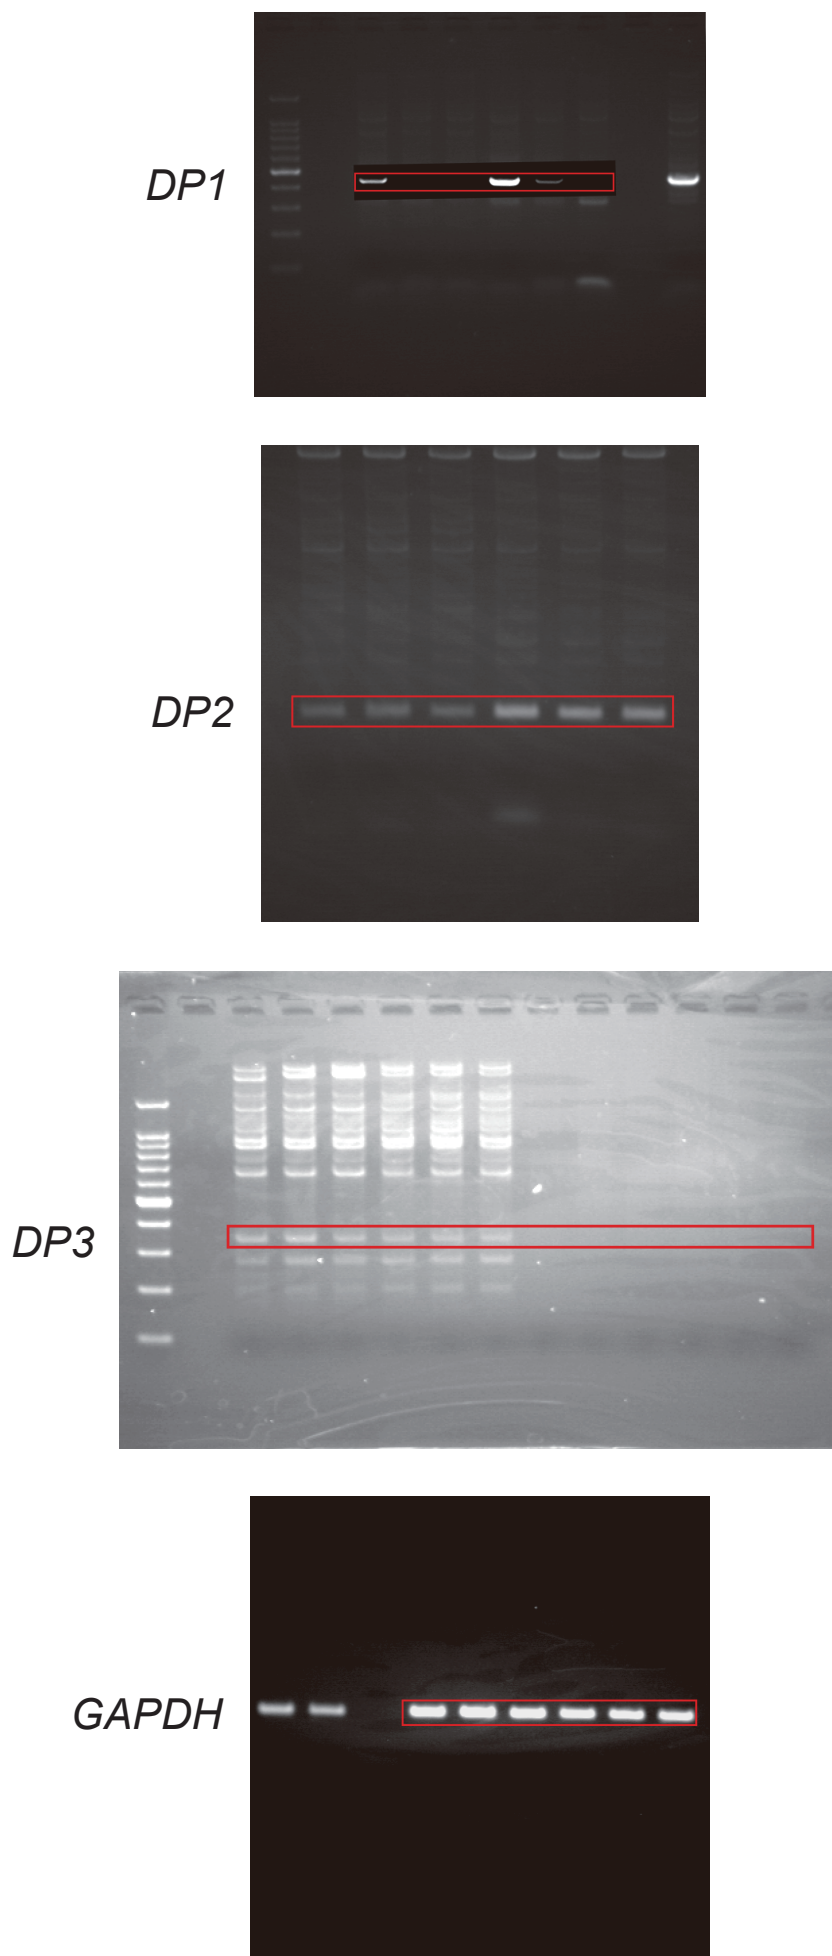

Supplementary Figure S14

Full-length gels of indicated PCR products illustrated in Figure 4(B).



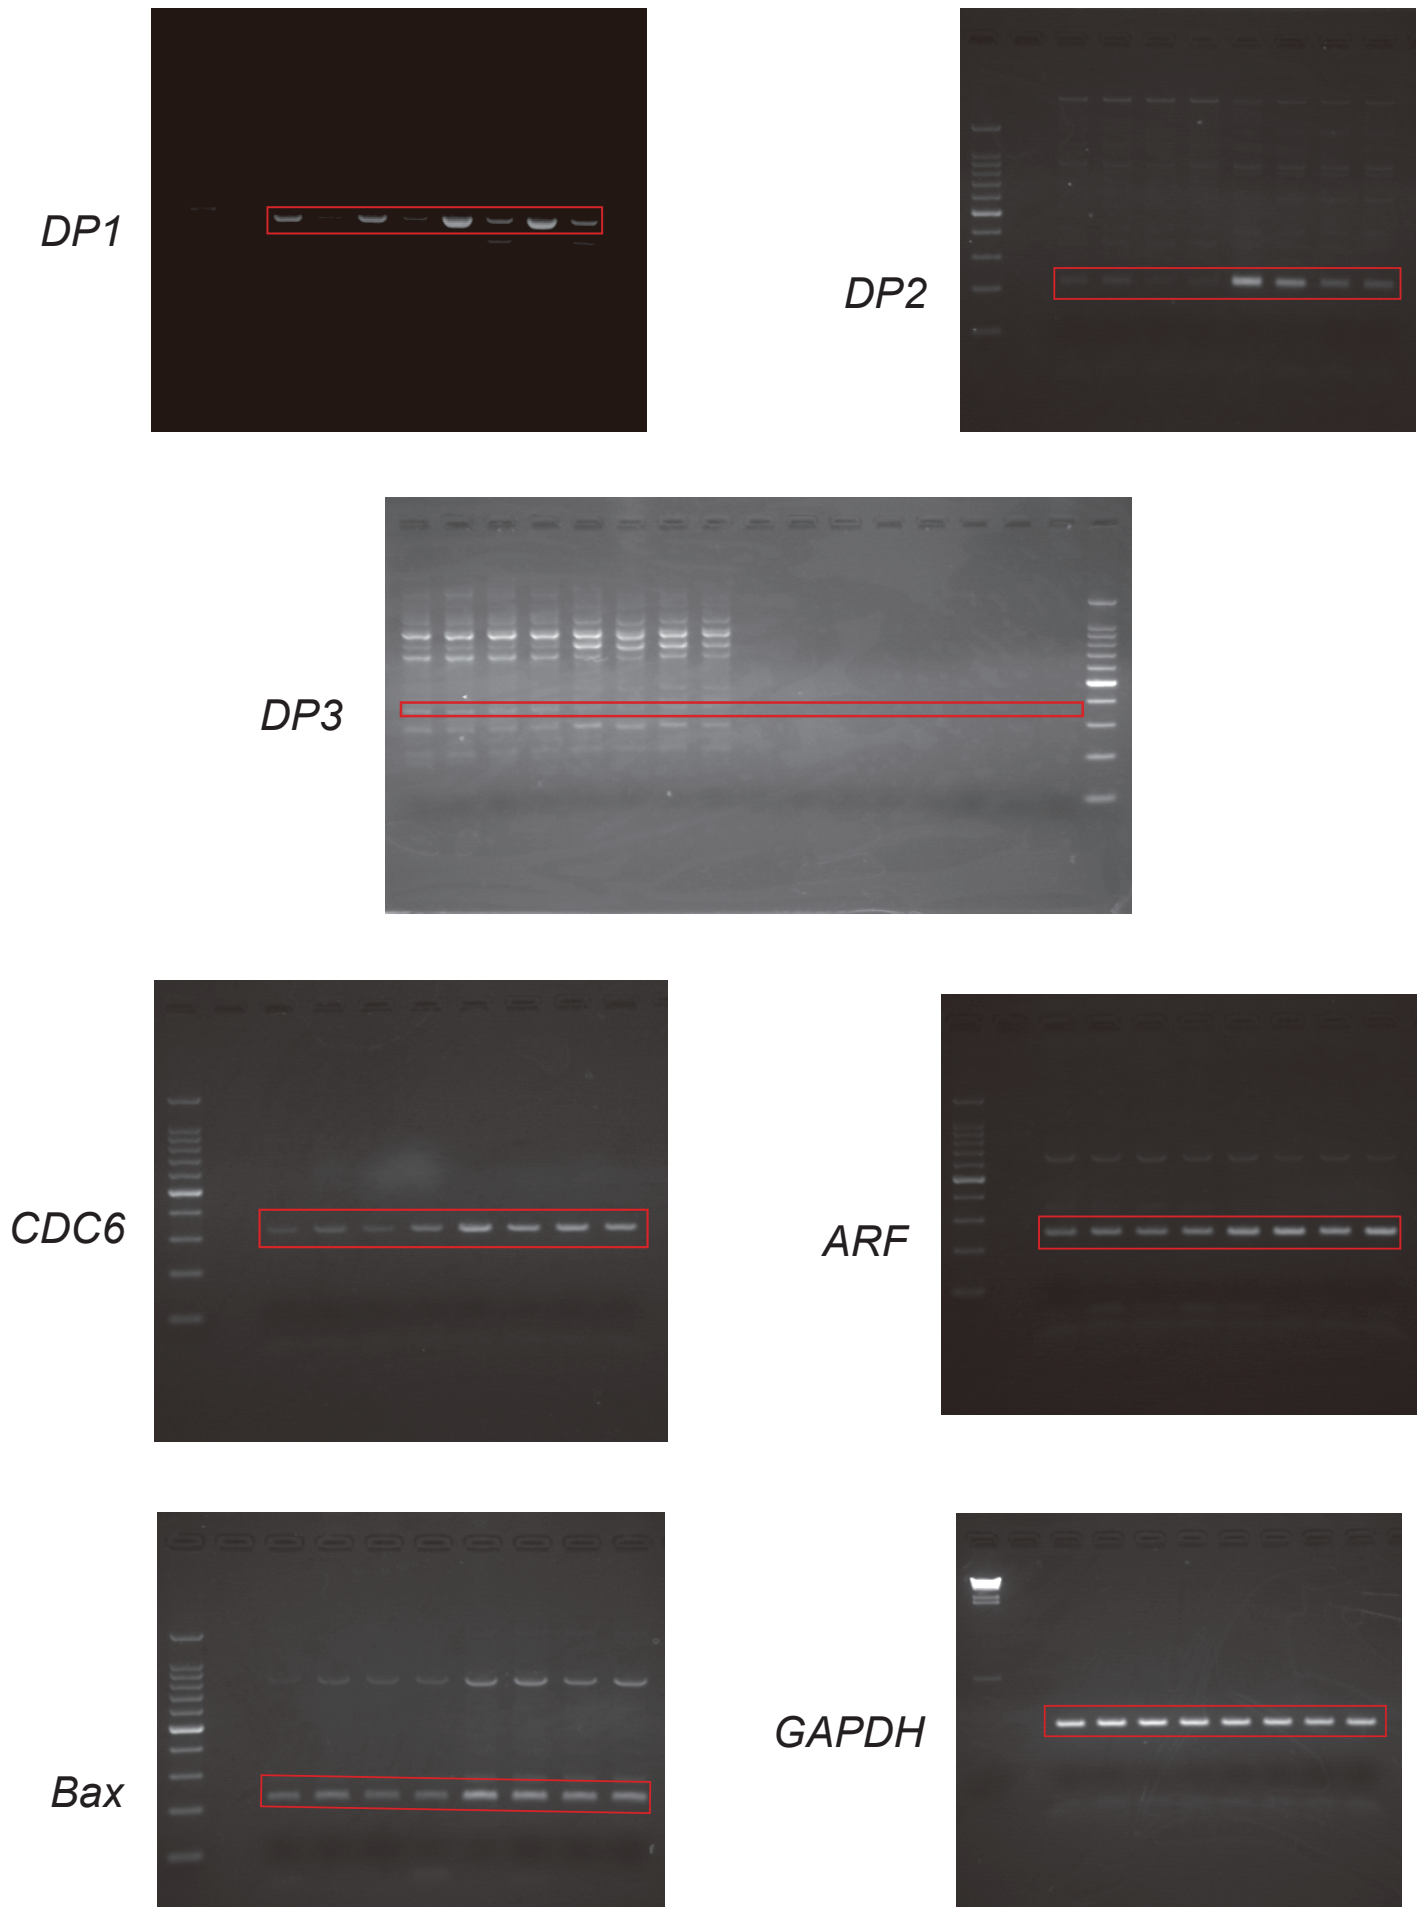

Supplementary Figure S15

Full-length gels of indicated PCR products illustrated in Figure 5(A).

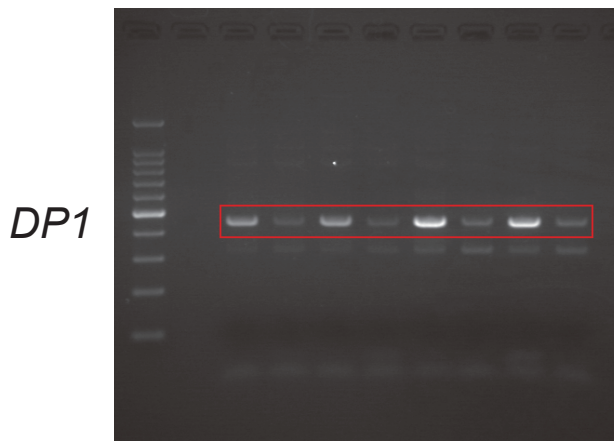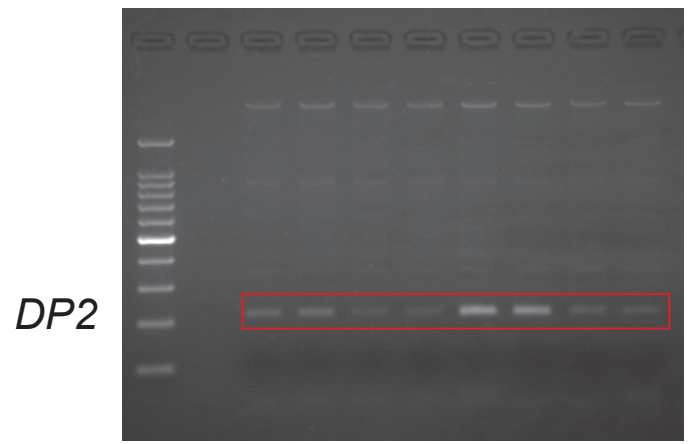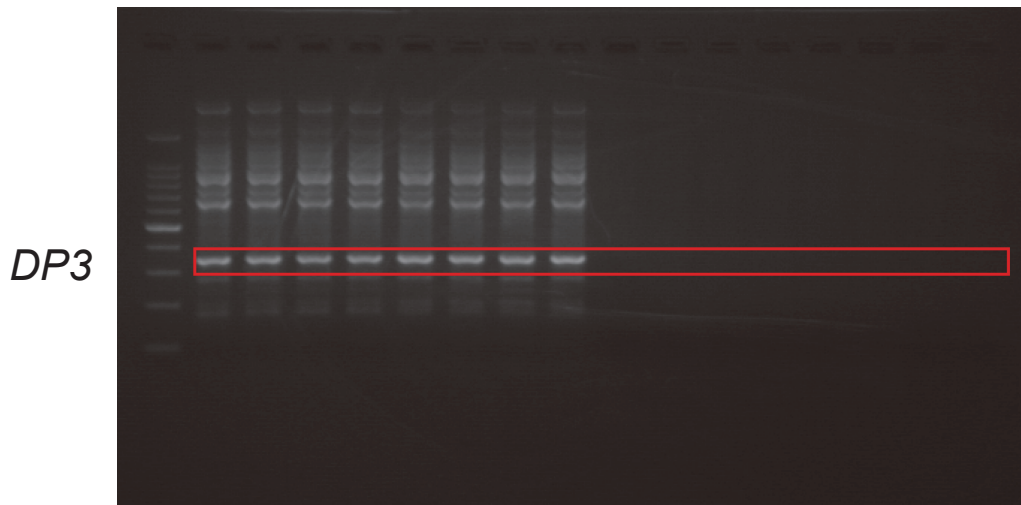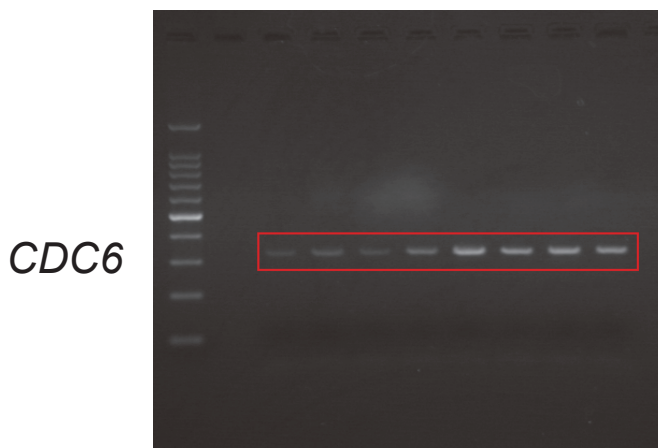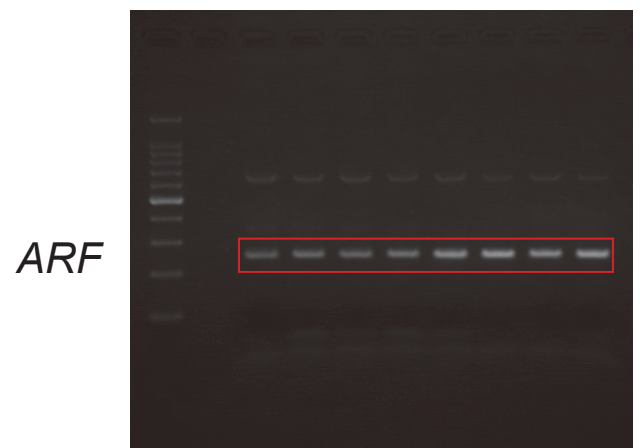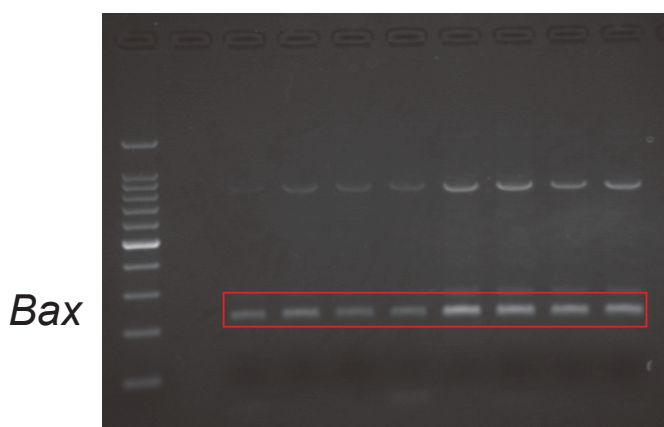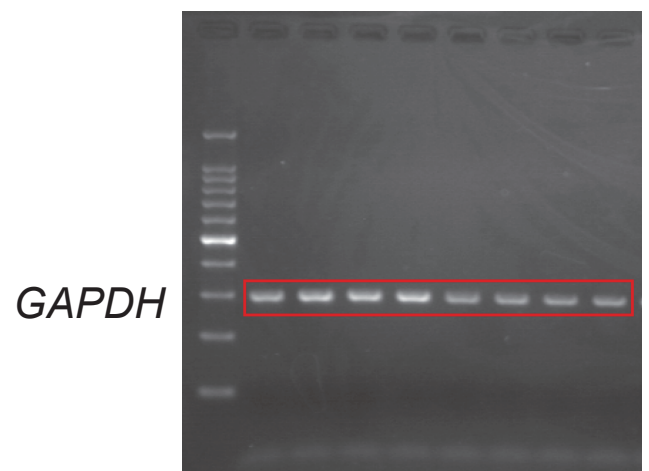

Supplementary Figure S16

Full-length gels of indicated PCR products illustrated in Figure 5(B).

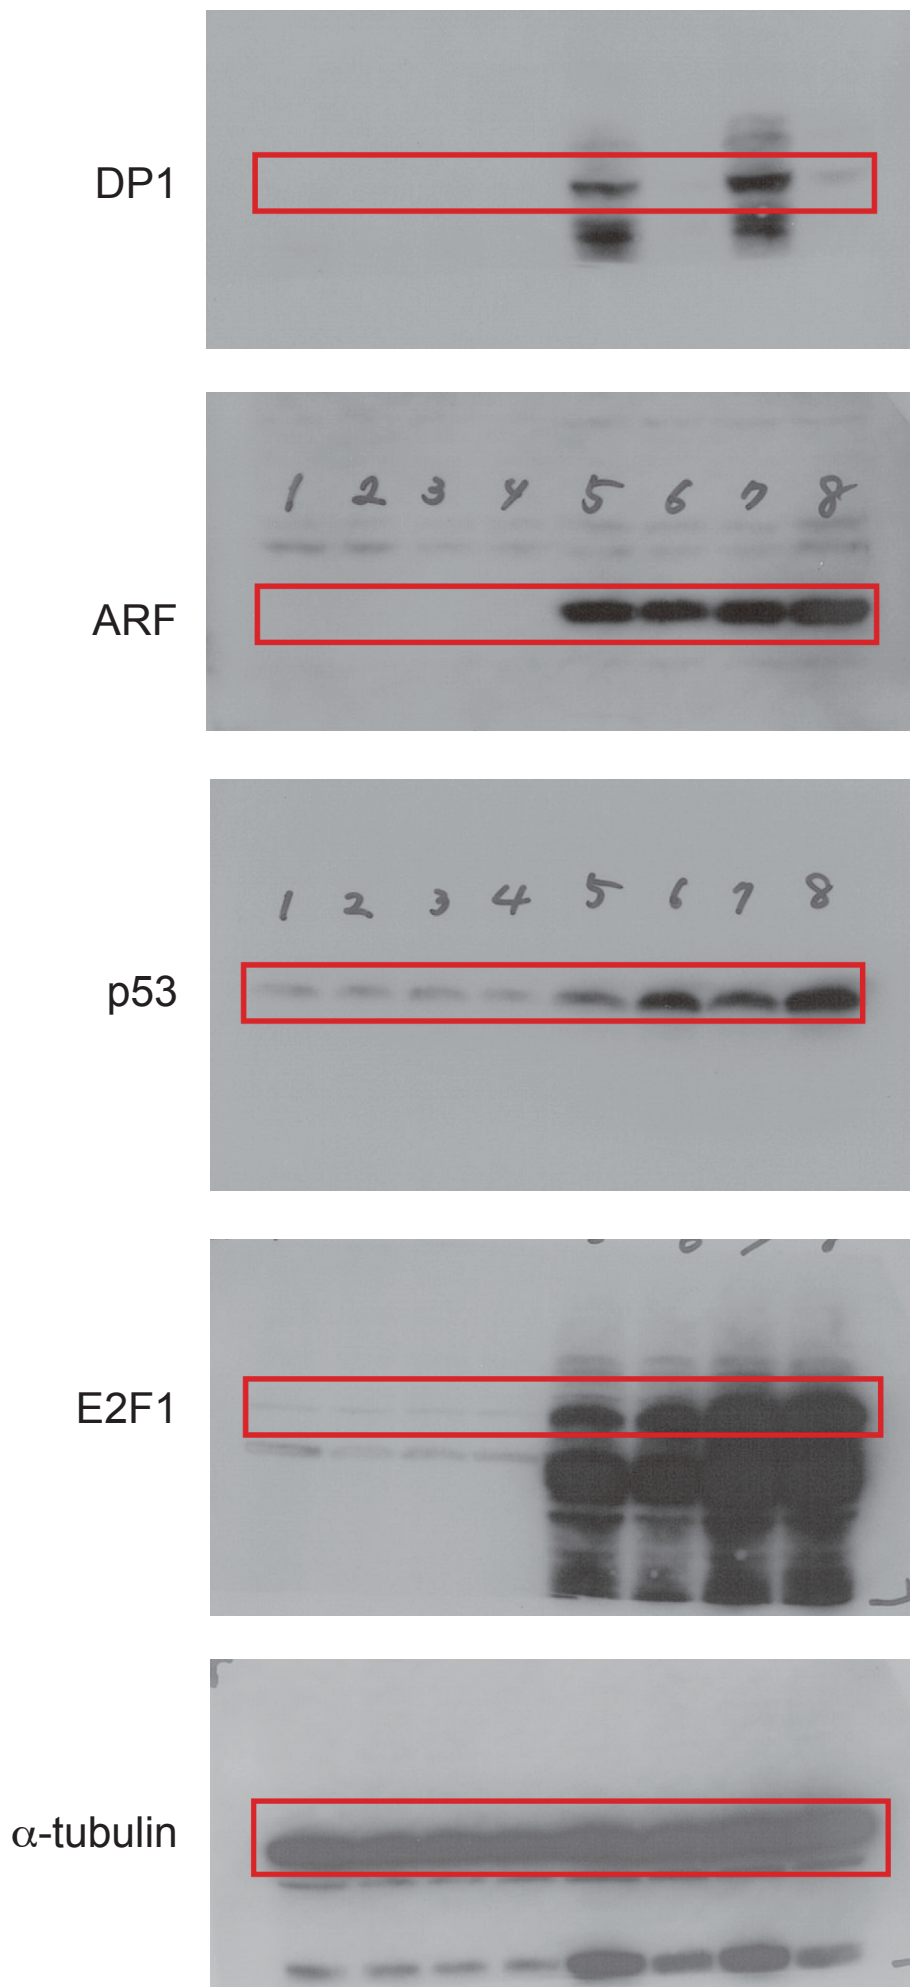

Supplementary Figure S17

Full-length blots of indicated proteins illustrated in Figure 5(C).



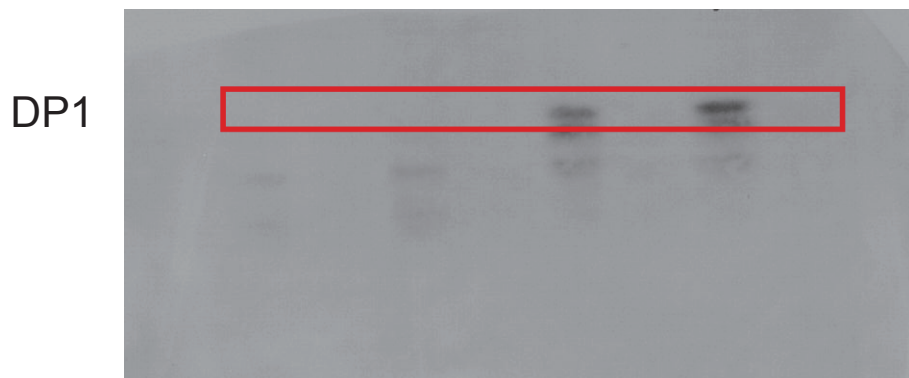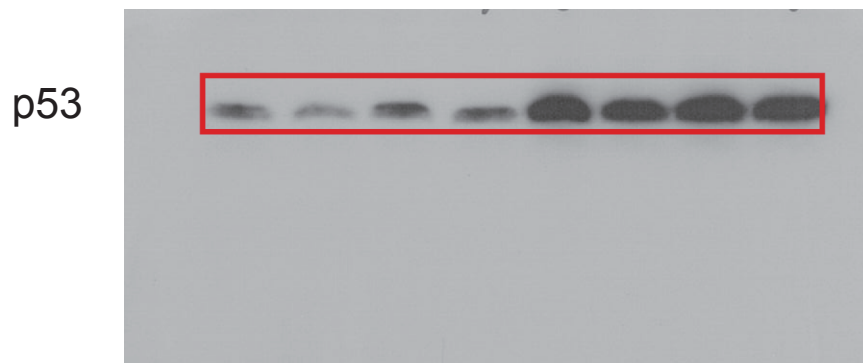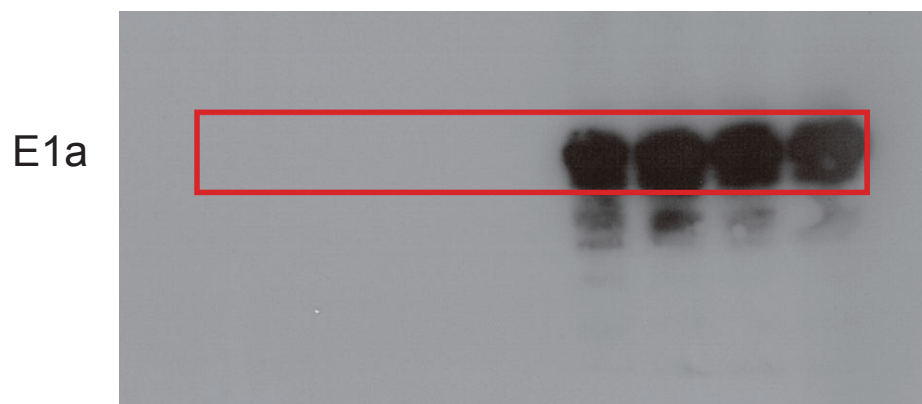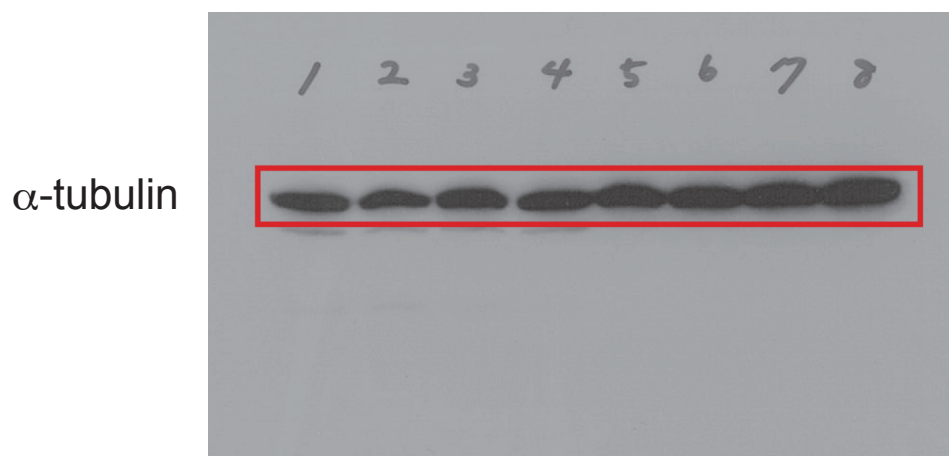

Supplementary Figure S18

Full-length blots of indicated proteins illustrated in Figure 5(D).

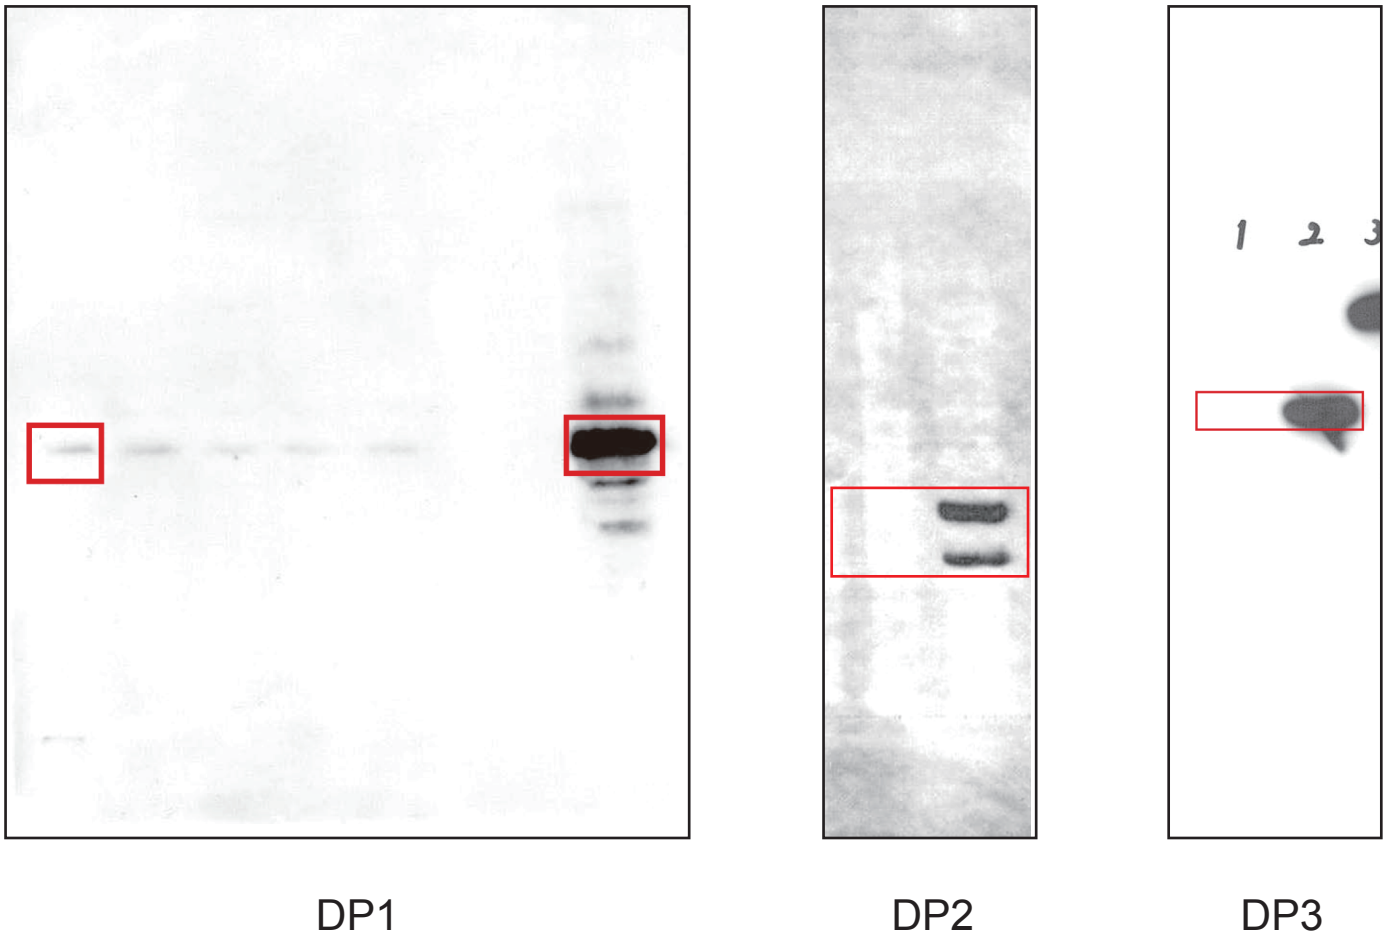

Supplementary Figure S19

Full-length blots of DP proteins illustrated in Figure 5(H).
